- conductance *versus* the modified COMFORT sedation score as a measure of discomfort in artificially ventilated children. *Pediatrics* 2008; 122:e848-53
10. Ledowski T, Bromilow J, Paech MJ, Storm H, Hacking R, Schug SA: Monitoring of skin conductance to assess postoperative pain intensity. *Br J Anaesth* 2006; 97:862-5
  11. Ledowski T, Bromilow J, Wu J, Paech MJ, Storm H, Schug SA: The assessment of postoperative pain by monitoring skin conductance: Results of a prospective study. *Anaesthesia* 2007; 62:989-93
  12. Crandall M, Lammers C, Senders C, Savedra M, Braun JV: Initial validation of a numeric zero to ten scale to measure children's state anxiety. *Anesth Analg* 2007; 105:1250-3
  13. Gagliese L, Weizblit N, Ellis W, Chan VW: The measurement of postoperative pain: A comparison of intensity scales in younger and older surgical patients. *Pain* 2005; 117:412-20
  14. Hicks CL, von Baeyer CL, Spafford PA, van Korlaar I, Goodenough B: The Faces Pain Scale-Revised: Toward a common metric in pediatric pain measurement. *Pain* 2001; 93:173-83
  15. Caldwell-Andrews AA, Blount RL, Mayes LC, Kain ZN: Behavioral interactions in the perioperative environment: A new conceptual framework and the development of the perioperative child-adult medical procedure interaction scale. *ANESTHESIOLOGY* 2005; 103:1130-5
  16. Trudeau JD, Lamb E, Gowans M, Lauder G: A prospective audit of postoperative pain control in pediatric patients. *AORN J* 2009; 90:531-42
  17. Bland JM, Altman DG: Statistical methods for assessing agreement between two methods of clinical measurement. *Lancet* 1986; 1:307-10
  18. Hullett B, Chambers N, Preuss J, Zamudio I, Lange J, Pascoe E, Ledowski T: Monitoring electrical skin conductance: A tool for the assessment of postoperative pain in children? *ANESTHESIOLOGY* 2009; 111:513-7

## ANESTHESIOLOGY REFLECTIONS

### Mariani's Coca Plant

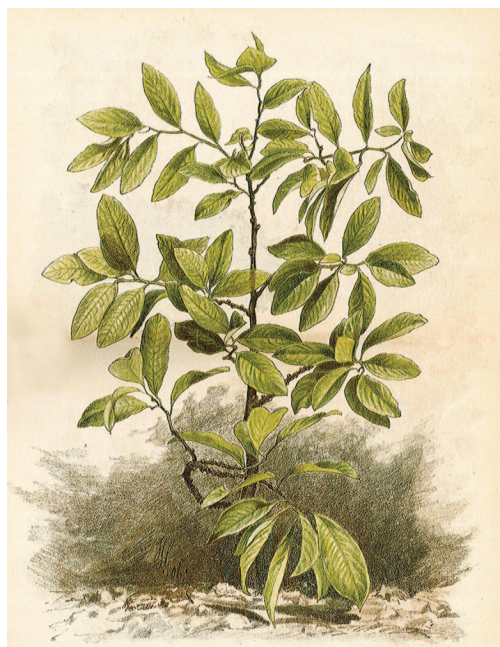

In 1863 a Corsican native named Angelo Mariani (1838–1914) became one of France's most famous and wealthy chemists by concocting a "coca wine" that would be marketed worldwide as "Vin Mariani." Hailed as a panacea by thousands of leading physicians, this cocaine-and-Bordeaux tonic was even publicly endorsed from London by Queen Victoria and from Rome by at least two Popes. One of Mariani's many coca-inspired illustrations is this example (*above*, courtesy of the Wood Library-Museum), his *Reproduction of a Coca Plant Presented by Mr. Mariani to the Paris Botanical Gardens*. His Vin Mariani would inspire the development of America's leading cocaine tonic, Coca Cola. (Copyright © the American Society of Anesthesiologists, Inc. This image appears in color in the *Anesthesiology Reflections* online collection available at [www.anesthesiology.org](http://www.anesthesiology.org).)

George S. Bause, M.D., M.P.H., Honorary Curator, ASA's Wood Library-Museum of Anesthesiology, Park Ridge, Illinois, and Clinical Associate Professor, Case Western Reserve University, Cleveland, Ohio. [UJYC@aol.com](mailto:UJYC@aol.com).
